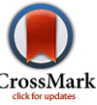

## Correction

# Correction: HLA Alleles Influence the Clinical Signature of Amoxicillin-Clavulanate Hepatotoxicity

## The PLOS ONE Staff

The following information is missing from the Funding section:  
This study was supported by grant EU-ERDF (PI12/00378) from the Instituto de Salud Carlos III.

## Reference

1. Stephens C, López-Nevot M-Á, Ruiz-Cabello F, Ulzurrun E, Soriano G, et al. (2013) HLA Alleles Influence the Clinical Signature of Amoxicillin-Clavulanate Hepatotoxicity. PLoS ONE 8(7): e68111. doi:10.1371/journal.pone.0068111

---

**Citation:** The PLOS ONE Staff (2014) Correction: HLA Alleles Influence the Clinical Signature of Amoxicillin-Clavulanate Hepatotoxicity. PLoS ONE 9(10): e112165. doi:10.1371/journal.pone.0112165

**Published:** October 23, 2014

**Copyright:** © 2014 The PLOS ONE Staff. This is an open-access article distributed under the terms of the Creative Commons Attribution License, which permits unrestricted use, distribution, and reproduction in any medium, provided the original author and source are credited.
